# Supplementary material for: Post-marketing active surveillance of Guillain Barré Syndrome following COVID-19 vaccination in persons aged ≥12 years in Italy: A multi-database self-controlled case series study
Source: PubMed Central journal article supplement (PMC10798452; doi:10.1371/journal.pone.0290879), 2024-01-19
Supplement: pone.0290879.s002.pdf [file pone.0290879.s002.pdf]

## SUPPORTING INFORMATION

### Post-marketing active surveillance of Guillain Barré Syndrome following COVID-19 vaccination in persons aged ≥12 years in Italy: a multi-database self-controlled case series study

Morciano C & Spila Alegiani S, et al.

**S1 Table. Characteristics of vaccinated population aged ≥12 years by age group (27 Dec. 2020-30 Sep. 2021)**

|                                           | Total            | Age 12-39 years  | Age 40-59 years  | Age ≥60 years    |
|-------------------------------------------|------------------|------------------|------------------|------------------|
|                                           | N. (%)           | N. (%)           | N. (%)           | N. (%)           |
| <b>Number of subjects</b>                 | 15,986,009       | 3,491,047        | 5,772,511        | 6,722,451        |
| <b>Sex, n. (%)</b>                        |                  |                  |                  |                  |
| Males                                     | 7,607,597 (47.6) | 1,750,701 (50.1) | 2,830,813 (49.0) | 3,026,083 (45.0) |
| Females                                   | 8,378,412 (52.4) | 1,740,346 (49.9) | 2,941,698 (51.0) | 3,696,368 (55.0) |
| <b>Regions, n. (%)</b>                    |                  |                  |                  |                  |
| Lombardia                                 | 7,683,100 (48.1) | 2,356,666 (67.5) | 2,664,257 (46.2) | 2,662,177 (39.6) |
| Friuli Venezia Giulia                     | 780,904 (4.9)    | 190,668 (5.5)    | 256,566 (4.4)    | 33,3670 (5.0)    |
| Veneto                                    | 2,457,271 (15.4) | 260,949 (7.5)    | 949,680 (16.5)   | 1,246,642 (18.5) |
| Emilia Romagna                            | 2,257,835 (14.1) | 360,267 (10.3)   | 817,441 (14.2)   | 1,08,0127 (16.1) |
| Lazio                                     | 2,806,899 (17.6) | 322,497 (9.2)    | 1,084,567 (18.8) | 1,399,835 (20.8) |
| <b>n. prescriptions* median [IQR]</b>     | 3 [0-16]         | 0 [0-1]          | 1 [0-7]          | 16 [5-32]        |
| <b>Hospitalizations≥1**, n. (%)</b>       | 2,328,902 (14.6) | 364,043 (10.4)   | 612,087 (10.6)   | 1,352,772 (20.1) |
| <b>Charlson index≥1***, n. (%)</b>        | 1,492,389 (9.3)  | 46,029 (1.3)     | 249,828 (4.3)    | 1,196,532 (17.8) |
| <b>Comorbidities, n. (%)</b>              |                  |                  |                  |                  |
| Hypertension                              | 5,544,989 (34.7) | 60,820 (1.7)     | 1,124,452 (19.5) | 4,359,717 (64.9) |
| Infection                                 | 4,119,897 (25.8) | 650,170 (18.6)   | 1,350,769 (23.4) | 2,118,958 (31.5) |
| Ulcer disease                             | 3,400,860 (21.3) | 154,697 (4.4)    | 770,887 (13.4)   | 2,475,276 (36.8) |
| Cardiovascular/cerebrovascular diseases   | 2,782,479 (17.4) | 67,212 (1.9)     | 364,056 (6.3)    | 2,351,211 (35.0) |
| Hematologic disease                       | 2,464,774 (15.4) | 183,137 (5.2)    | 504,280 (8.7)    | 1,777,357 (26.4) |
| Neurological diseases (excl. Dementia)    | 1,932,003 (12.1) | 147,406 (4.2)    | 519,760 (9.0)    | 1,264,837 (18.8) |
| Neoplasms                                 | 1,569,419 (9.8)  | 46,242 (1.3)     | 330,143 (5.7)    | 1,193,034 (17.7) |
| Diabetes mellitus                         | 1,407,622 (8.8)  | 54,846 (1.6)     | 268,801 (4.7)    | 1,083,975 (16.1) |
| COPD                                      | 1,273,224 (8.0)  | 201,918 (5.8)    | 362,903 (6.3)    | 708,403 (10.5)   |
| Acute and other chronic pulmonary disease | 395,814 (2.5)    | 12,792 (0.4)     | 61,130 (1.1)     | 321,892 (4.8)    |
| Rheumatic diseases                        | 324,731 (2.0)    | 31,803 (0.9)     | 106,698 (1.8)    | 186,230 (2.8)    |
| Chronic kidney failure                    | 238,511 (1.5)    | 7,223 (0.2)      | 33,040 (0.6)     | 198,248 (2.9)    |
| Hepatopathy                               | 221,532 (1.4)    | 12,153 (0.3)     | 81,508 (1.4)     | 127,871 (1.9)    |
| Dementia                                  | 124,112 (0.8)    | 88 (0.003)       | 1,469 (0.03)     | 122,555 (1.8)    |
| HIV                                       | 65,754 (0.4)     | 6,832 (0.2)      | 34,509 (0.6)     | 24,413 (0.4)     |
| Regional and ulcerative colitis           | 82,109 (0.5)     | 13,861 (0.4)     | 32,522 (0.6)     | 35,726 (0.5)     |
| Cystic fibrosis                           | 2,067 (0.01)     | 1,359 (0.04)     | 546 (0.01)       | 162 (0.002)      |
| <b>Comedications, n. (%)</b>              |                  |                  |                  |                  |
| Corticosteroids for systemic use          | 1,346,138 (8.4)  | 130,966 (3.8)    | 460,120 (8.0)    | 755,052 (11.2)   |
| NSAID use                                 | 917,928 (5.7)    | 34,358 (1.0)     | 270,876 (4.7)    | 612,694 (9.1)    |
| Estroprogestinics use                     | 186,545 (1.2)    | 34,020 (1.0)     | 96,349 (1.7)     | 56,176 (0.8)     |
| <b>Deaths (all causes), n. (%)</b>        | 77,808 (0.5)     | 303 (0.01)       | 2,967 (0.1)      | 74,538 (1.1)     |

\*all drug prescriptions within the last 12 months prior to anti-COVID-19 first dose administration; \*\* any hospital admissions within the 2 years prior to anti-COVID-19 first dose administration; \*\*\* within the 5 years prior to anti-COVID-19 first dose administration

n.: number; IQR: Interquartile Range; excl.: excluding; COPD: Chronic Obstructive Pulmonary Disease; HIV: Human Immunodeficiency Virus; NSAID: Non-Steroidal Anti-Inflammatory Drugs
