# Supplementary material for: Post-marketing active surveillance of Guillain Barré Syndrome following COVID-19 vaccination in persons aged ≥12 years in Italy: A multi-database self-controlled case series study
Source: PubMed Central journal article supplement (PMC10798452; doi:10.1371/journal.pone.0290879), 2024-01-19
Supplement: pone.0290879.s003.pdf [file pone.0290879.s003.pdf]

**SUPPORTING INFORMATION**

**Post-marketing active surveillance of Guillain Barré Syndrome following COVID-19 vaccination in persons aged  $\geq 12$  years in Italy: a multi-database self-controlled case series study**

Morciano C & Spila Alegiani S, et al.

**S2 Table. Excess of cases estimates with 95% CIs for GBS cases corresponding to exposures with RIs estimated in the 42 days risk period with  $p < 0.05$**

| Vaccine exposure | Cases in 42 days risk period | Relative Incidence | Attributable Fraction | Excess cases due to the vaccine | Doses     | EC x 100,000 vaccinated (95% CI) |
|------------------|------------------------------|--------------------|-----------------------|---------------------------------|-----------|----------------------------------|
| Dose 1 mRNA-1273 | 7                            | 6.83               | 0.85                  | 6.0                             | 1,706,979 | 0.4 (0.1-0.7)                    |
| Dose 2 mRNA-1273 | 5                            | 7.41               | 0.87                  | 4.3                             | 1,330,527 | 0.3 (0.05-0.6)                   |
| Dose 1 ChAdOx1-S | 34                           | 6.52               | 0.85                  | 28.8                            | 2,863,950 | 1.0 (0.7-1.3)                    |

*EC: Excess of cases; CI: Confidence interval*
